# Supplementary material for: A highly selective “turn-on” electroanalysis strategy with reduced copper metal–organic frameworks for sensing histamine and histidine
Source: Royal Society of Chemistry journal article supplement (doi:10.1039/c9nr05681e), 2019-01-01
Supplement: c9nr05681e1.pdf [file c9nr05681e1.pdf]

## Electronic Supplementary Information

### **A Highly-Selective “Turn-on” Electroanalysis Strategy with Reduced Copper Metal-Organic Frameworks for Sensing Histamine and Histidine**

Yue Hua, Yuanyuan Cai, Huan Liu, Yuqi Wan, Xiju Ding, Shuai Li, and Hua Wang\*

Rizhao Key Laboratory of Marine Medicine and Materials Applied Technologies, College of Chemistry and Chemical Engineering, Qufu Normal University, Qufu City, Shandong Province 273165, P. R. China.

\*Corresponding Author: E-mail addresses: [huawang@qfnu.edu.cn](mailto:huawang@qfnu.edu.cn); Tel: +86 537 4456306; Fax: +86 537 4456306; Web: <http://wang.qfnu.edu.cn>.

**Table S1.** Comparison of analytical results for HTA among different analysis methods

| <b>Analysis methods</b>                                                | <b>Linear ranges (<math>\mu\text{M}</math>)</b> | <b>LODs (nM)</b> |
|------------------------------------------------------------------------|-------------------------------------------------|------------------|
| Cu nanoclusters-based fluorimetry <sup>1</sup>                         | 0.10 – 10                                       | 60               |
| Copper plating electrode-based electroanalysis assay <sup>2</sup>      | 1.0 – 750                                       | 300              |
| Platinum-graphene composites-based electroanalysis method <sup>3</sup> | 0.10 – 300                                      | 25.4             |
| This work                                                              | 0.010 – 100                                     | 12.5             |

**Table S2.** Recovery test results of the developed electroanalysis method in detecting HTA and His separately in red wine and urine samples (n=5).

| Samples        | HTA / His concentrations |                           | Recoveries (%) |
|----------------|--------------------------|---------------------------|----------------|
|                | Added ( $\mu\text{M}$ )  | Founded ( $\mu\text{M}$ ) |                |
| Red wine (HTA) | 20.0                     | 18.2 $\pm$ 1.4            | 91             |
|                | 100.0                    | 96.4 $\pm$ 7.6            | 96.4           |
| Urine (His)    | 20.0                     | 19.5 $\pm$ 0.7            | 97.5           |
|                | 100.0                    | 98.3 $\pm$ 7.2            | 98.3           |

1. A. Han, L. Xiong, S. Hao, Y. Yang, X. Li, G. Fang, J. Liu, Y. Pei and S. Wang, *Analytical Chemistry*, 2018, **90**, 9060-9067.
2. Y.-T. Lin, C.-H. Chen and M. S. Lin, *Sensors and Actuators B: Chemical*, 2018, **255**, 2838-2843.
3. I. M. Apetrei and C. Apetrei, *Sensors*, 2016, **16**, 422.
